# Supplementary material for: Crystal structure of the new FeSe1−x superconductor
Source: Royal Society of Chemistry journal article supplement (doi:10.1039/b813076k), 2008-01-01
Supplement: b813076k.pdf [file b813076k.pdf]

**Electronic Supplementary Information for “Crystal structure of the new FeSe<sub>1-x</sub> superconductor”**

**Serena Margadonna,<sup>\*a</sup> Yasuhiro Takabayashi,<sup>b</sup> Martin T. McDonald,<sup>b</sup> Karolina Kasperkiewicz,<sup>a</sup> Yoshikazu Mizuguchi,<sup>c</sup> Yoshihiko Takano,<sup>c</sup> Andrew N. Fitch,<sup>d</sup> Emmanuelle Suard<sup>e</sup> and Kosmas Prassides<sup>\*b</sup>**

<sup>a</sup> *School of Chemistry, University of Edinburgh, Edinburgh, UK EH9 3JJ*

<sup>b</sup> *Department of Chemistry, University of Durham, Durham, UK DH1 3LE*

<sup>c</sup> *National Institute for Materials Science, 1-2-1 Sengen, Tsukuba 305-0047, Japan*

<sup>d</sup> *European Synchrotron Radiation Facility, 38043 Grenoble, France.*

<sup>e</sup> *Institut Laue Langevin, 38042 Grenoble, France*

**Table 1S. Refined structural parameters and selected bond lengths (Å) and angles (°) for FeSe<sub>1-x</sub> obtained from combined Rietveld refinements of the synchrotron X-ray and neutron powder diffraction data at 5 and 295 K.**

|             |                                           | 5 K                                              | 295 K                           |
|-------------|-------------------------------------------|--------------------------------------------------|---------------------------------|
| Space group |                                           | <i>Cmma</i>                                      | <i>P4/nmm</i>                   |
|             | <i>a</i> (Å)                              | 5.30781(5)                                       | 3.77376(2)                      |
|             | <i>b</i> (Å)                              | 5.33423(5)                                       |                                 |
|             | <i>c</i> (Å)                              | 5.48600(5)                                       | 5.52482(5)                      |
|             | Volume (Å <sup>3</sup> )                  | 155.325(2)                                       | 78.680(1)                       |
| Fe          | <i>B</i> <sub>iso</sub> (Å <sup>2</sup> ) | 0.60(2)                                          | 2.05(3)                         |
|             | Occ.                                      | 1.00                                             | 1.00                            |
| Se          | <i>z</i>                                  | 0.2653(1)                                        | 0.2652(1)                       |
|             | <i>B</i> <sub>iso</sub> (Å <sup>2</sup> ) | 0.35(2)                                          | 1.50(2)                         |
|             | Occ.                                      | 0.92(1)                                          | 0.91(1)                         |
|             | <i>R</i> <sub>wp</sub> (%) (SXRPD)        | 8.34                                             | 7.87                            |
|             | <i>R</i> <sub>exp</sub> (%) (SXRPD)       | 5.04                                             | 4.75                            |
|             | <i>R</i> <sub>wp</sub> (%) (NPD)          | 3.77                                             | 5.80                            |
|             | <i>R</i> <sub>exp</sub> (%) (NPD)         | 2.27                                             | 3.50                            |
|             | χ <sup>2</sup> (combined)                 | 2.750                                            | 2.743                           |
|             | Fe-Fe (Å)                                 | 2.65391(3) (2x)<br>2.66713(3) (2x)               | 2.66845(1) (4x)                 |
|             | Fe-Se (Å)                                 | 2.3787(4) (4x)                                   | 2.3890(4) (4x)                  |
|             | Fe-Se-Fe (°)                              | 104.54(2) (2x)<br>68.20(1) (2x)<br>67.82(2) (2x) | 104.34(3) (2x)<br>67.90(1) (4x) |

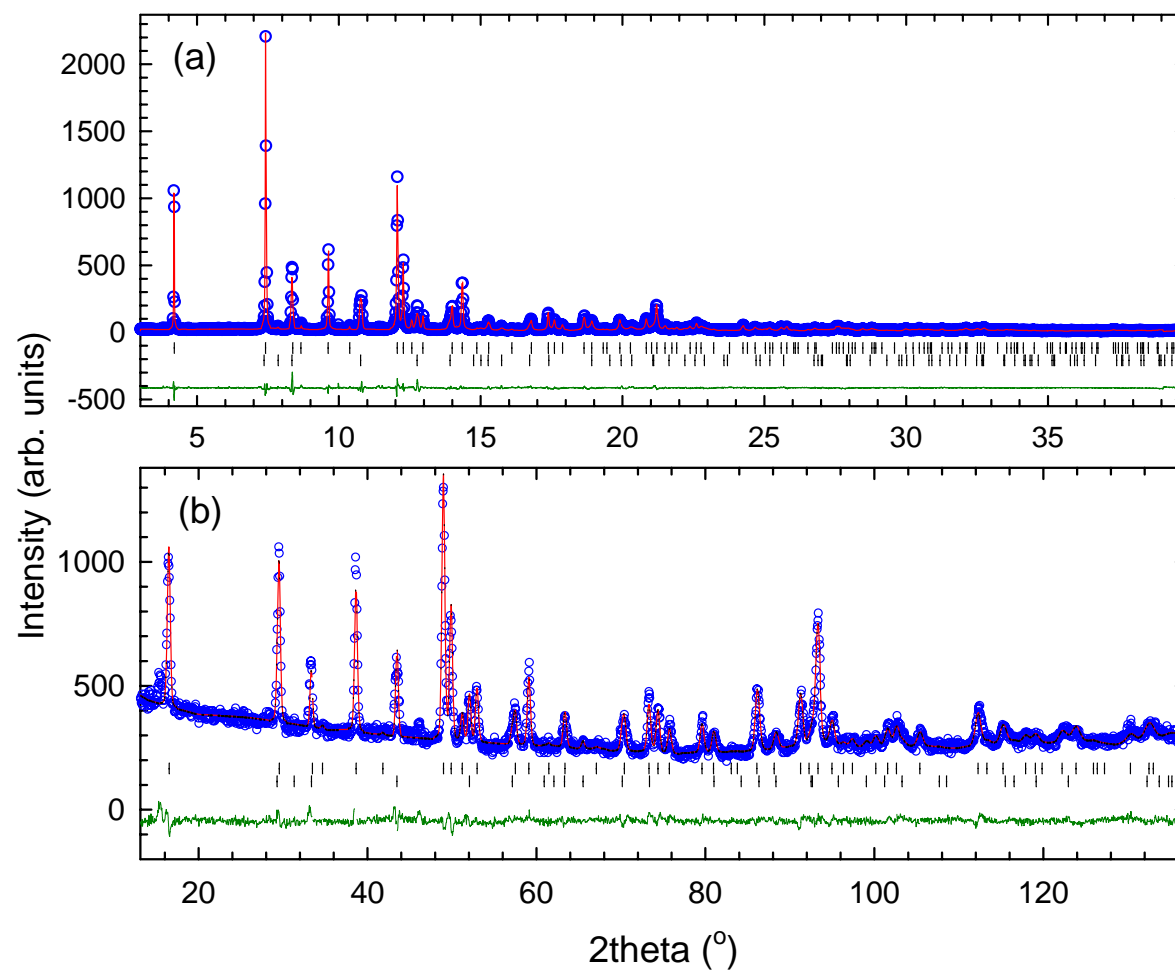

Figure 1S. Final observed (circles) and calculated (solid lines) (a) synchrotron X-ray ( $\lambda = 0.40301 \text{ \AA}$ ) and (b) neutron ( $\lambda = 1.5944 \text{ \AA}$ ) powder diffraction profiles for the  $\alpha$ -FeSe<sub>1-x</sub> sample at 295 K. The lower solid lines show the difference profiles and the tick marks show the reflection positions of the  $\alpha$ - (top) and  $\beta$ -FeSe<sub>1-x</sub> (bottom) phases.
